# Supplementary material for: Evaluating the Metal Tolerance Capacity of Microbial Communities Isolated from Alberta Oil Sands Process Water
Source: PubMed Central journal article supplement (PMC4743850; doi:10.1371/journal.pone.0148682), 2016-02-05
Supplement: pone.0148682.s001.pdf [file pone.0148682.s001.pdf]

**All Metals****Class I****Class II****A**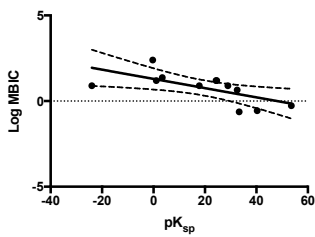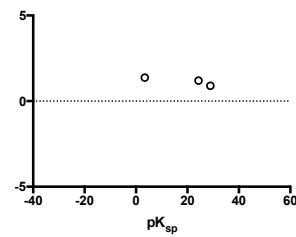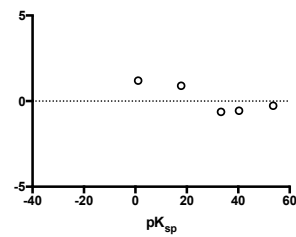**B**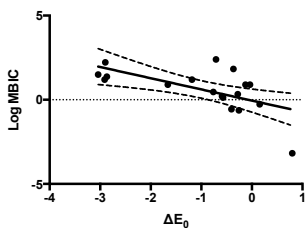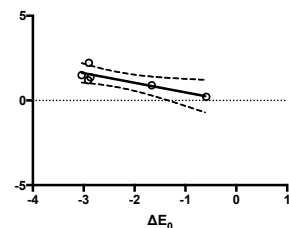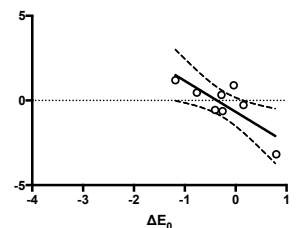**C**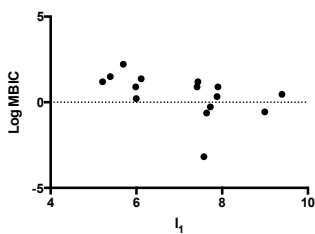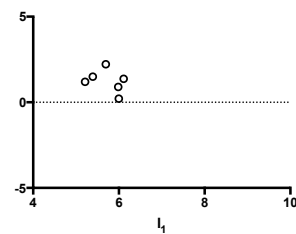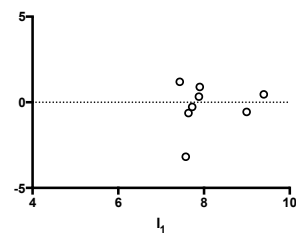**D**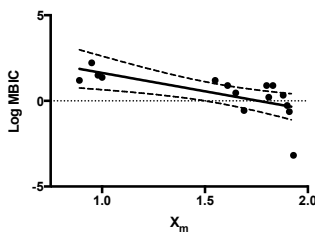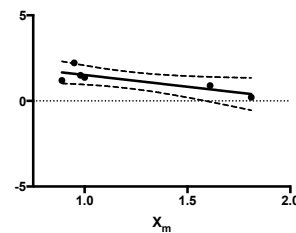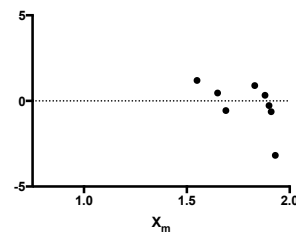**E**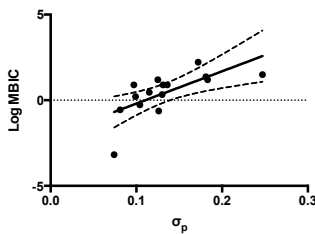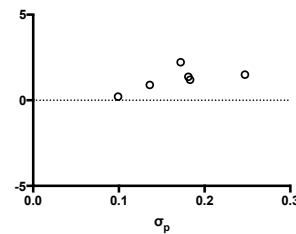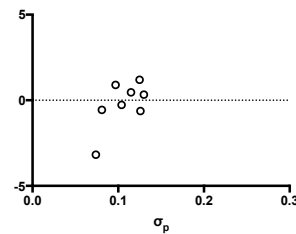**F**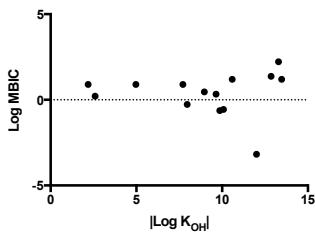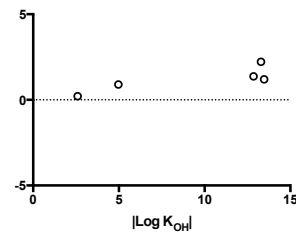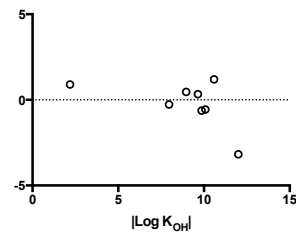**i****ii****iii**
