# Supplementary material for: Evaluating the Metal Tolerance Capacity of Microbial Communities Isolated from Alberta Oil Sands Process Water
Source: PubMed Central journal article supplement (PMC4743850; doi:10.1371/journal.pone.0148682), 2016-02-05
Supplement: pone.0148682.s004.pdf [file pone.0148682.s004.pdf]

## All Metals

## Class I

## Class II

A

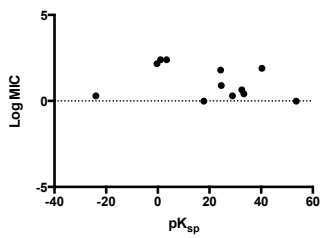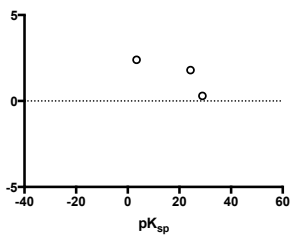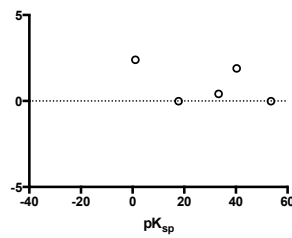

B

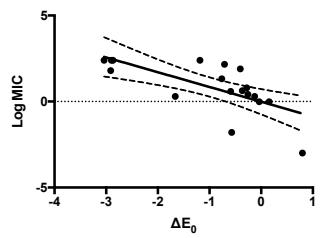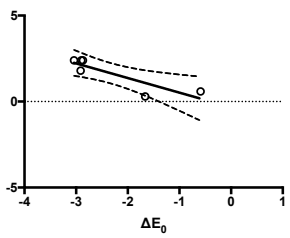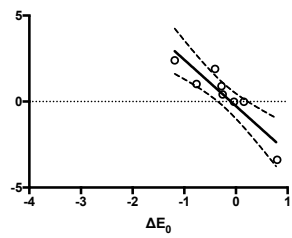

C

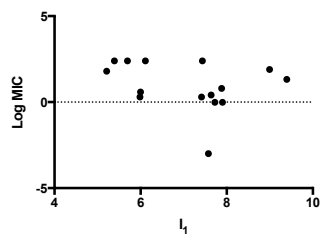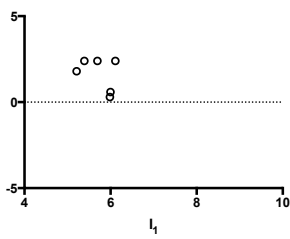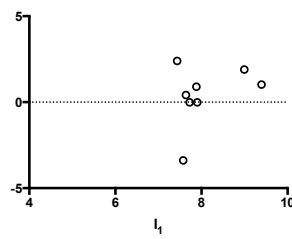

D

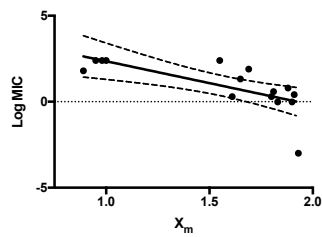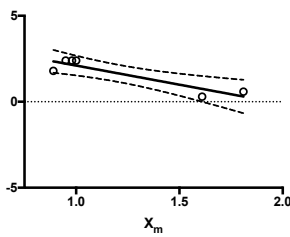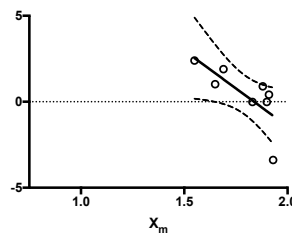

E

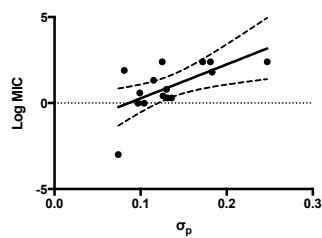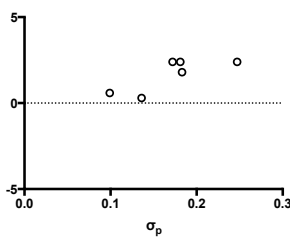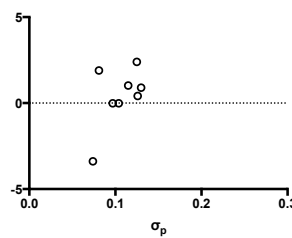

F

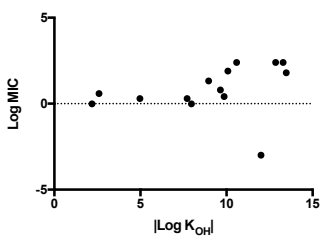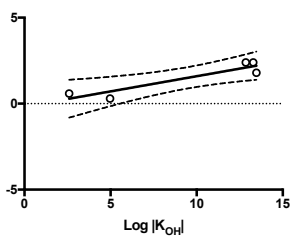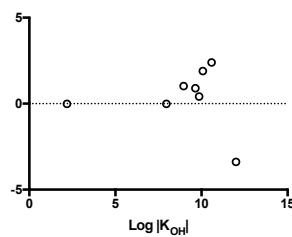

i

ii

iii
