# Supplementary material for: Evaluating the Metal Tolerance Capacity of Microbial Communities Isolated from Alberta Oil Sands Process Water
Source: PubMed Central journal article supplement (PMC4743850; doi:10.1371/journal.pone.0148682), 2016-02-05
Supplement: pone.0148682.s006.pdf [file pone.0148682.s006.pdf]

| Metal | OSPW Community               |                                     | <i>C. metallidurans</i>     |                              |        |
|-------|------------------------------|-------------------------------------|-----------------------------|------------------------------|--------|
|       | MICY                         | MBICY                               | MICY                        | MBICY                        | MIC*   |
| Li    | 208 ± 72<br>(125 - 250)      | 31.2                                | >250                        | 250                          |        |
| Mg    | >250                         | >250                                | ≥250                        | 208 ± 72.2<br>(125 - 250)    |        |
| Ca    | 52.1 ± 18.1<br>(31.2 - 62.5) | 23.4 ± 13.5<br>(7.8 - 31.2)         | >250                        | 125                          |        |
| Sr    | 52.1 ± 18.1<br>(31.2 - 62.5) | 167 ± 72<br>(125 - 250)             | 250                         | 104 ± 36<br>(62.5 - 250)     |        |
| Ba    | 15.6                         | 15.6                                | 62.5                        | 31.2                         |        |
| Al    | 3.9                          | 7.8                                 | 1.96                        | 1.96                         |        |
| Ga    | 7.8                          | 1.63 ± 0.57<br>(0.98 - 1.96)        | 3.9                         | 2.93 ± 1.12<br>(1.96 - 3.9)  |        |
| Fe    | 6.5 ± 2.3<br>(3.9 - 7.8)     | 7.8                                 | 0.98                        | 0.98                         |        |
| Ag    | 0.0005                       | 0.0007 ± 0.0002<br>(0.0005 - 0.001) | 0.001                       | 0.001                        | 0.0003 |
| Cd    | 0.60 ± 0.57<br>(0.08 - 1.6)  | 0.27 ± 0.24<br>(0.05 - 0.62)        | 78.1 ± 38.3<br>(31.2 - 125) | 15 ± 13.4<br>(3.9 - 31.2)    | 4      |
| Mn    | 15.6                         | 15.6                                | 250                         | 31.2                         | 25     |
| Co    | 1.65 ± 1.70<br>(0.1 - 3.2)   | 2.12 ± 2.53<br>(0.02 - 6.2)         | 6.2                         | 6.2                          | 25     |
| Ni    | 0.56 ± 0.28<br>(0.2 - 0.98)  | 0.23 ± 0.15<br>(0.1 - 0.4)          | 2.6 ± 1.1<br>(1.96 - 3.9)   | 0.98                         | 13     |
| Cu    | 0.51 ± 0.15<br>(0.4 - 0.8)   | 0.53 ± 0.23<br>(0.4 - 0.8)          | 0.98                        | 5.85 ± 8.44<br>(0.98 - 15.6) | 3      |
| Zn    | 7.8                          | 2.9 ± 1.7<br>(0.98 - 3.9)           | 20.8 ± 9.0<br>(15.6 - 31.2) | 13 ± 4.5<br>(7.8 - 15.6)     | 12     |
| Pb    | 7.8                          | 7.8                                 | 1.96                        | 3.9                          | 1      |
| V     | >4.4                         | >4.4                                | >4.4                        | ≥4.4                         |        |
| Mo    | 15.6                         | 15.6                                | 7.8                         | 7.8                          |        |
| W     | 23.4 ± 11.0<br>(15.6 - 31.2) | 78.1 ± 66.3<br>(31.2 - 125)         | 125                         | 208 ± 72<br>(125 - 250)      |        |
| As    | >250                         | >250                                | 145 ± 96<br>(62.5 - 250)    | 208 ± 72<br>(125 - 250)      |        |
| Te    | 5.83 ± 10.7<br>(0.4 - 25)    | 1.35 ± 0.56<br>(0.8 - 1.96)         | 0.016                       | 0.008                        |        |
| Se    | 60 ± 40.8<br>(25 - 125)      | 67.5 ± 56.3<br>(12.5 - 125)         | 4.26 ± 3.5<br>(0.1 - 7.8)   | 2.43 ± 1.15<br>(1.6 - 3.9)   |        |
