# Supplementary material for: Evaluating the Metal Tolerance Capacity of Microbial Communities Isolated from Alberta Oil Sands Process Water
Source: PubMed Central journal article supplement (PMC4743850; doi:10.1371/journal.pone.0148682), 2016-02-05
Supplement: pone.0148682.s007.pdf [file pone.0148682.s007.pdf]

| Salt                                                                               | Metal | Oxidation No. | Class (a) | HSAB | pK <sub>sp</sub> | ΔE0     | I <sub>1</sub> | X <sub>m</sub> | σ <sub>p</sub> | log KOH |
|------------------------------------------------------------------------------------|-------|---------------|-----------|------|------------------|---------|----------------|----------------|----------------|---------|
| LiCl                                                                               | Li    | [I]           | I         | HA   |                  | -3.0401 | 5.391719       | 0.98           | 0.247          |         |
| MgSO <sub>4</sub>                                                                  | Mg    | [II]          | I         | HA   | -0.3             | -2.372  | 7.646235       | 1.31           | 0.167          |         |
| CaCl <sub>2</sub>                                                                  | Ca    | [II]          | I         | HA   |                  | -2.868  | 6.11316        | 1.00           | 0.181          | 12.85   |
| SrCl <sub>2</sub>                                                                  | Sr    | [II]          | I         | HA   | 3.4              | -2.899  | 5.69485        | 0.95           | 0.172          | 13.29   |
| BaO                                                                                | Ba    | [II]          | I         | HA   | 1.1              | -2.912  | 5.211664       | 0.89           | 0.183          | 13.47   |
| Al <sub>2</sub> (SO <sub>4</sub> ) <sub>3</sub> ·xH <sub>2</sub> O                 | Al    | [III]         | I         | HA   | -24              | -1.662  | 5.985768       | 1.61           | 0.136          | 4.97    |
| Ga(NO <sub>3</sub> ) <sub>3</sub>                                                  | Ga    | [III]         | I         | HA   |                  | -0.589  | 5.999301       | 1.81           | 0.099          | 2.6     |
| Fe <sub>2</sub> (SO <sub>4</sub> ) <sub>3</sub>                                    | Fe    | [III]         | II        | HA   |                  | -0.037  | 7.9024         | 1.83           | 0.097          | 2.19    |
| AgNO <sub>3</sub>                                                                  | Ag    | [I]           | II        | SA   | 53.6             | 0.7996  | 7.57623        | 1.93           | 0.074          | 12      |
| 3CdSO <sub>4</sub> ·8H <sub>2</sub> O                                              | Cd    | [II]          | II        | SA   | 33.3             | -0.403  | 8.99382        | 1.69           | 0.081          | 10.08   |
| MnSO <sub>4</sub> ·H <sub>2</sub> O                                                | Mn    | [II]          | II        | BA   | 17.8             | -1.185  | 7.43402        | 1.55           | 0.125          | 10.59   |
| CoCl <sub>2</sub>                                                                  | Co    | [II]          | II        | BA   | 24.6             | -0.28   | 7.88101        | 1.88           | 0.130          | 9.65    |
| NiCl <sub>2</sub> ·6H <sub>2</sub> O                                               | Ni    | [II]          | II        | BA   | 24.3             | -0.257  | 7.6398         | 1.91           | 0.126          | 9.86    |
| CuSO <sub>4</sub> ·5H <sub>2</sub> O                                               | Cu    | [II]          | II        | BA   | 40.3             | 0.153   | 7.72638        | 1.90           | 0.104          | 7.96    |
| ZnCl <sub>2</sub>                                                                  | Zn    | [II]          | II        | BA   | 28.9             | -0.7618 | 9.394199       | 1.65           | 0.115          | 8.96    |
| Pb(NO <sub>3</sub> ) <sub>2</sub>                                                  | Pb    | [II]          | III       | BA   | 32.5             | -0.1262 | 7.41663        | 1.80           | 0.131          | 7.71    |
| V <sub>2</sub> O <sub>5</sub>                                                      | V     | [V]           |           |      |                  |         |                |                |                |         |
| (NH <sub>4</sub> ) <sub>6</sub> Mo <sub>7</sub> O <sub>24</sub> ·4H <sub>2</sub> O | Mo    | [VI]          |           |      |                  |         |                |                |                |         |
| Na <sub>2</sub> WO <sub>4</sub> ·2H <sub>2</sub> O                                 | W     | [VI]          |           |      |                  |         |                |                |                |         |
| Na <sub>2</sub> HAsO <sub>4</sub> ·7H <sub>2</sub> O                               | As    | [V]           |           |      |                  | -0.71   |                |                |                |         |
| K <sub>2</sub> TeO <sub>3</sub> ·xH <sub>2</sub> O                                 | Te    | [IV]          |           |      |                  | -0.57   |                |                |                |         |
| Na <sub>2</sub> SeO <sub>3</sub>                                                   | Se    | [IV]          |           |      |                  | -0.366  |                |                |                |         |
